# Supplementary material for: Pharmacological Inhibition of the VCP/Proteasome Axis Rescues Photoreceptor Degeneration in RHOP23H Rat Retinal Explants
Source: MDPI journal article supplement (doi:10.3390/biom11101528), 2021-10-16
Supplement: s1 [file s1]

Supplementary file

Pharmacological inhibition of the VCP/proteasome axis rescues photoreceptor degeneration in RHO<sup>P23H</sup> rat retinal explants

Merve Sen, Oksana Kutsyr, Bowen Cao, Sylvia Bolz, Blanca Arango-Gonzalez\*, Marius Ueffing\*

Table S1: References list for the chosen concentrations in this study.

| Treatment    | Concentrations           | References                                                       |
|--------------|--------------------------|------------------------------------------------------------------|
| Geldanamycin | 0.01, 0.1, and 1 $\mu$ M | Wu et al., 2010; Karkoulis et al., 2013                          |
| Kifunensine  | 1, 10 and 100 $\mu$ M    | Kosmaoglu et al., 2009; Saeed et al., 2011; Elfrink et al., 2013 |
| NMS-873      | 0.5, 1 and 5 $\mu$ M     | Lin et al., 2017; Bastola et al., 2017                           |
| Bortezomib   | 0.01, 0.1, and 1 $\mu$ M | Hili et al., 2009, Obeng et al., 2006                            |

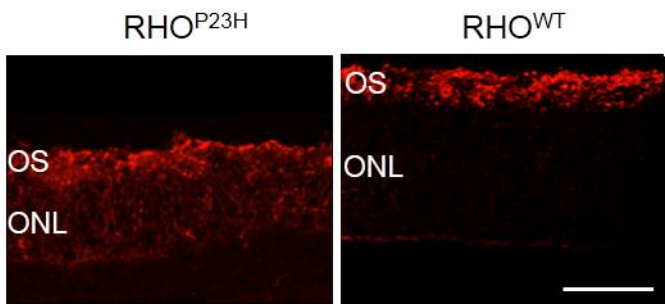

Figure S1: Rhodopsin localization in RHO<sup>P23H</sup> and RHO<sup>WT</sup> retinal organotypic cultures. Fluorescent labeling in cryosections designates the location of rhodopsin (red staining) in RHO<sup>P23H</sup> and RHO<sup>WT</sup> organotypic retinal cultures at PN15, explanted at postnatal day 9 and cultivated for 6 days (PN9 DIV6). Scale bar is 50  $\mu$ m. OS: outer segment, ONL: outer nuclear layer, RHO: rhodopsin, WT: wild type.

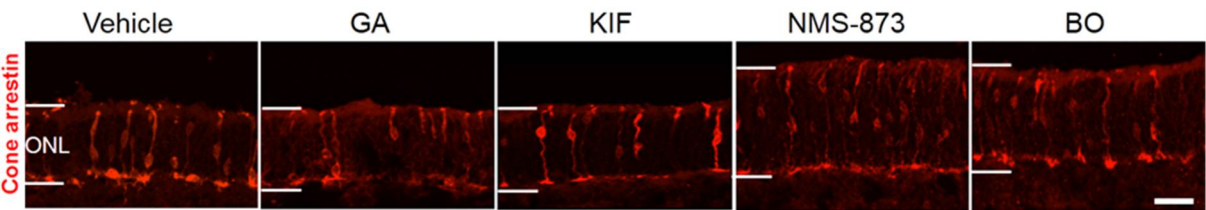

Figure S2: Pharmacological interference in the VCP/proteasome axis increases the organization of cone photoreceptors in RHO<sup>P23H</sup> retinal organotypic cultures. Fluorescent labeling in cryosections designates the location of cone arrestin (red staining) in RHO<sup>P23H</sup> retinal organotypic cultures at PN15, explanted at postnatal day 9 and cultivated for 6 days (PN9 DIV6), treated with corresponding vehicles (H<sub>2</sub>O or DMSO) or Hsp90 inhibitor GA (1  $\mu$ M), ERM1 inhibitor KIF (100  $\mu$ M), VCP inhibitor NMS-873 (5  $\mu$ M), and proteasome inhibitor BO (1  $\mu$ M). Retinae treated with VCP or proteasome inhibitors but not with GA or KIF showed increased cone length and migration to the ONL. Scale bar is 50  $\mu$ m. ONL: outer nuclear layer, GA: Geldanamycin, KIF: Kifunensine, BO: Bortezomib.

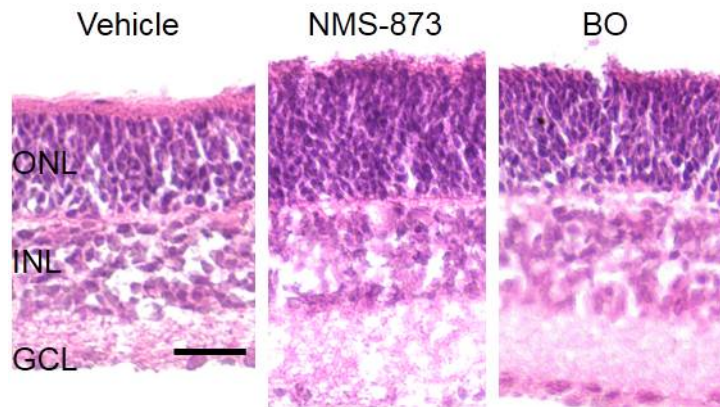

**Figure S3:** Modulation of the VCP/proteasome axis improves retinal structure in RHO<sup>P23H</sup> retinal organotypic cultures. Retinae of RHO<sup>P23H</sup> transgenic rats were explanted at postnatal day 9 and cultivated for 6 days (PN9 DIV6), treated with corresponding vehicle (DMSO) or VCP inhibitor NMS-873 (5  $\mu$ M), and proteasome inhibitor BO (1  $\mu$ M). Scale bar is 20  $\mu$ m. ONL: outer nuclear layer, INL: inner nuclear layer, GCL: ganglion cell layer, BO: Bortezomib.

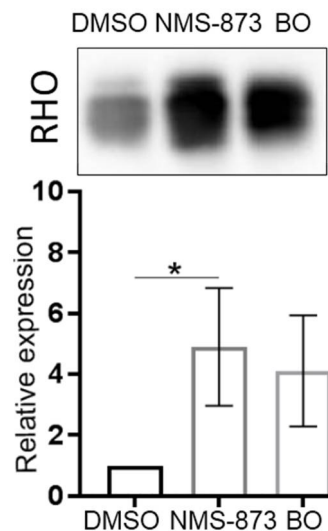

**Figure S4:** Representative image of Western blot detection of rhodopsin for the lysate of RHO<sup>P23H</sup> organotypic retinal explants at PN15, explanted at postnatal day 9 and cultivated for 6 days (PN9 DIV6), treated with DMSO (1%), NMS-873 (5  $\mu$ M), and BO (1  $\mu$ M). Densitometric analysis of RHO band intensities (37 kDa) in the treated retinae to the vehicle treated control showed increased RHO expression after inhibition of VCP or proteasome in RHO<sup>P23H</sup> retinae. The data are presented as mean  $\pm$ SD, and one-way ANOVA analysis was performed. \* $p$ <0.05. RHO: rhodopsin, BO: Bortezomib.

#### References:

- Wu, W.C.; Wu, M.H.; Chang, Y.C.; Hsieh, M.C.; Wu, H.J.; Cheng, K.C.; Lai, Y.H.; Kao, Y.H. Geldanamycin and its analog induce cytotoxicity in cultured human retinal pigment epithelial cells. *Exp. Eye Res.* 2010, 91, 211–219, doi:10.1016/j.exer.2010.05.005.
- Karkoulis, P.K.; Stravopodis, D.J.; Konstantakou, E.G.; Voutsinas, G.E. Targeted inhibition of heat shock protein 90 disrupts multiple oncogenic signaling pathways, thus inducing cell cycle arrest and programmed cell death in human urinary bladder cancer cell lines. *Cancer Cell Int.* 2013, 13, 11, doi:10.1186/1475-2867-13-11.

- Kosmaoglou, M.; Kanuga, N.; Aguilà, M.; Garriga, P.; Cheetham, M.E. A dual role for EDEM1 in the processing of rod opsin. *J. Cell Sci.* 2009, 122, 4465–4472, doi:10.1242/jcs.055228.
- Saeed, M.; Suzuki, R.; Watanabe, N.; Masaki, T.; Tomonaga, M.; Muhammad, A.; Kato, T.; Matsuura, Y.; Watanabe, H.; Wakita, T.; et al. Role of the Endoplasmic Reticulum-associated Degradation (ERAD) pathway in degradation of hepatitis C virus envelope proteins and production of virus particles. *J. Biol. Chem.* 2011, 286, 37264–37273, doi:10.1074/jbc.M111.259085.
- Elfrink, H.L.; Zwart, R.; Baas, F.; Scheper, W. Inhibition of endoplasmic reticulum associated degradation reduces endoplasmic reticulum stress and alters lysosomal morphology and distribution. *Mol. Cells* 2013, 35, 291–297, doi:10.1007/s10059-013-2286-9.
- Lin, Y.T.; Prendergast, J.; Grey, F. The host ubiquitin-dependent segregase VCP/p97 is required for the onset of human cytomegalovirus replication. *PLoS Pathog.* 2017, 13, e1006329, doi:10.1371/journal.ppat.1006329.
- Bastola, P.; Wang, F.; Schaich, M.A.; Gan, T.; Freudenthal, B.D.; Chou, T.F.; Chien, J. Specific mutations in the D1–D2 linker region of VCP/p97 enhance ATPase activity and confer resistance to VCP inhibitors. *Cell Death Discov.* 2017, 3, 1–9, doi:10.1038/cddiscovery.2017.65.
- Hili, D.S.; Martin, S.; Armstrong, J.L.; Flockhart, R.; Tonison, J.J.; Simpson, D.G.; Birch-Machin, M.A.; Redfern, C.P.F.; Lovat, P.E. Combining the endoplasmic reticulum stress-inducing agents bortezomib and fenretinide as a novel therapeutic strategy for metastatic melanoma. *Clin. Cancer Res.* 2009, 15, 1192–1198, doi:10.1158/1078-0432.CCR-08-2150.
- Obeng, E.A.; Carlson, L.M.; Gutman, D.M.; Harrington, W.J.; Lee, K.P.; Boise, L.H. Proteasome inhibitors induce a terminal unfolded protein response in multiple myeloma cells. *Blood* 2006, 107, 4907–4916, doi:10.1182/blood-2005-08-3531.
